# Supplementary material for: GoldVariants, a resource for sharing rare genetic variants detected in bleeding, thrombotic, and platelet disorders: Communication from the ISTH SSC Subcommittee on Genomics in Thrombosis and Hemostasis
Source: PubMed Central journal article supplement — J Thromb Haemost. 2021 Aug 5;19(10):2612–7. doi: 10.1111/jth.15459 (PMC9291976; doi:10.1111/jth.15459), 2021-08-05
Supplement: JTH-19-2612-s002.pdf [file JTH-19-2612-s002.pdf]

| Supplementary table 3 - Variants submitted by multiple centers and with different pathogenicity (PV, pathogenic variant; LPV, likely pathogenic variant; VUS, variant of uncertain significance; LBV, likely benign variant).                                                                    |         |           |                                                       |                                                                                                                                                   |                         |                                                                                                                                                                                                                                                                                                            |                                                                                                                                                                                           |
|--------------------------------------------------------------------------------------------------------------------------------------------------------------------------------------------------------------------------------------------------------------------------------------------------|---------|-----------|-------------------------------------------------------|---------------------------------------------------------------------------------------------------------------------------------------------------|-------------------------|------------------------------------------------------------------------------------------------------------------------------------------------------------------------------------------------------------------------------------------------------------------------------------------------------------|-------------------------------------------------------------------------------------------------------------------------------------------------------------------------------------------|
| One line represents one variant in one patient. The same submission centre might have multiple interpretations for the same variant as evidences accumulate over time and variant interpretation in one individual might not be the same as interpretation on a second individual later in time. |         |           |                                                       |                                                                                                                                                   |                         |                                                                                                                                                                                                                                                                                                            |                                                                                                                                                                                           |
| Center                                                                                                                                                                                                                                                                                           | Gene    | Variant   | Disorder name (compulsory)                            | Clinical features (optional)                                                                                                                      | Submitted pathogenicity | ClinVar Interpretation (access date 08/04/2021)                                                                                                                                                                                                                                                            | Gene-specific database                                                                                                                                                                    |
| Grupo Español de Alteraciones Plaquetarias                                                                                                                                                                                                                                                       | ACTN1   | R46Q      | Macrothrombocytopenia                                 | mean platelet volume >13 fl, platelet count <100 from routine blood test. Platelet count <50,000/mm <sup>3</sup> . Bleeding Assessment Tool (BAT) | LPV                     | 3 submissions: LPV, PV, PV (accession VCV000051196.1)                                                                                                                                                                                                                                                      | -                                                                                                                                                                                         |
| Grupo Español de Alteraciones Plaquetarias                                                                                                                                                                                                                                                       |         |           | Macrothrombocytopenia                                 |                                                                                                                                                   | LPV                     |                                                                                                                                                                                                                                                                                                            |                                                                                                                                                                                           |
| NIHR Biosource - Cambridge University, UK                                                                                                                                                                                                                                                        |         |           | Macrothrombocytopenia                                 |                                                                                                                                                   | PV                      |                                                                                                                                                                                                                                                                                                            |                                                                                                                                                                                           |
| Center for Molecular and Vascular Biology, L                                                                                                                                                                                                                                                     |         |           | Macrothrombocytopenia                                 |                                                                                                                                                   | PV                      |                                                                                                                                                                                                                                                                                                            |                                                                                                                                                                                           |
| Center for Molecular and Vascular Biology, L                                                                                                                                                                                                                                                     |         |           | Macrothrombocytopenia                                 |                                                                                                                                                   | PV                      |                                                                                                                                                                                                                                                                                                            |                                                                                                                                                                                           |
| NIHR Biosource - Cambridge University, UK                                                                                                                                                                                                                                                        | ANKRD26 | c.-126T>C | Autosomal dominant thrombocytopenia 2                 |                                                                                                                                                   | LPV                     | 4 submissions: PV, LPV, PV, PV (accession VCV000615436.1)                                                                                                                                                                                                                                                  | -                                                                                                                                                                                         |
| NIHR Biosource - Cambridge University, UK                                                                                                                                                                                                                                                        |         |           | Autosomal dominant thrombocytopenia 2                 |                                                                                                                                                   | PV                      |                                                                                                                                                                                                                                                                                                            |                                                                                                                                                                                           |
| Institute of Experimental Biomedicine, Univ                                                                                                                                                                                                                                                      |         |           | Thrombocytopenia                                      |                                                                                                                                                   | PV                      |                                                                                                                                                                                                                                                                                                            |                                                                                                                                                                                           |
| Grupo Español de Alteraciones Plaquetarias                                                                                                                                                                                                                                                       | ANKRD26 | c.-128G>A | Thrombocytopenia                                      | Misdiagnosis immune thrombocytopenia                                                                                                              | LPV                     | 1 submission: PV (accession VCV000801119.1)                                                                                                                                                                                                                                                                | -                                                                                                                                                                                         |
| NIHR Biosource - Cambridge University, UK                                                                                                                                                                                                                                                        |         |           | Autosomal dominant thrombocytopenia 2                 |                                                                                                                                                   | PV                      |                                                                                                                                                                                                                                                                                                            |                                                                                                                                                                                           |
| Northern Blood Research Centre, Sydney, AU                                                                                                                                                                                                                                                       |         |           | Autosomal dominant thrombocytopenia 2                 | Thrombocytopenia, menorrhagia, post-surgical bleeding. Three generations affected. Grandmother died of leukemia                                   | PV                      |                                                                                                                                                                                                                                                                                                            |                                                                                                                                                                                           |
| Northern Blood Research Centre, Sydney, AU                                                                                                                                                                                                                                                       |         |           | Autosomal dominant thrombocytopenia 2                 | Thrombocytopenia, menorrhagia, post-surgical bleeding. Three generations affected. Grandmother died of leukemia                                   | PV                      |                                                                                                                                                                                                                                                                                                            |                                                                                                                                                                                           |
| NIHR Biosource - Cambridge University, UK                                                                                                                                                                                                                                                        | F7      | G156S     | Factor VII deficiency                                 |                                                                                                                                                   | LPV                     | Absent                                                                                                                                                                                                                                                                                                     | <a href="https://r17-00.eanao.org/reports/5/cases/3/homozygous/2/heterozygous">https://r17-00.eanao.org/reports/5/cases/3/homozygous/2/heterozygous</a> . Pathogenicity: to be confirmed. |
| Katharine Dormandy Haemophilia and Thro                                                                                                                                                                                                                                                          |         |           | Factor VII deficiency                                 |                                                                                                                                                   | PV                      |                                                                                                                                                                                                                                                                                                            |                                                                                                                                                                                           |
| NIHR Biosource - Cambridge University, UK                                                                                                                                                                                                                                                        | GP1BB   | L16P      | Mild macrothrombocytopenia                            |                                                                                                                                                   | PV                      | 2 submissions: LPV, LPV (accession VCV000615638.1)                                                                                                                                                                                                                                                         | -                                                                                                                                                                                         |
| Center for Molecular and Vascular Biology, L                                                                                                                                                                                                                                                     |         |           | Mild macrothrombocytopenia                            | Autosomal dominant thrombocytopenia / aggregation defect with ADP / bleeding requiring transfusion after delivery                                 | PV                      |                                                                                                                                                                                                                                                                                                            |                                                                                                                                                                                           |
| Center for Molecular and Vascular Biology, L                                                                                                                                                                                                                                                     |         |           | Mild macrothrombocytopenia                            |                                                                                                                                                   | LPV                     |                                                                                                                                                                                                                                                                                                            |                                                                                                                                                                                           |
| Center for Molecular and Vascular Biology, L                                                                                                                                                                                                                                                     |         |           | Bernard-Soulier syndrome                              | Macrothrombocytopenia                                                                                                                             | LPV                     |                                                                                                                                                                                                                                                                                                            |                                                                                                                                                                                           |
| Center for Molecular and Vascular Biology, L                                                                                                                                                                                                                                                     |         |           | Bernard-Soulier syndrome                              | Macrothrombocytopenia                                                                                                                             | LPV                     |                                                                                                                                                                                                                                                                                                            |                                                                                                                                                                                           |
| NIHR Biosource - Cambridge University, UK                                                                                                                                                                                                                                                        | ITGA2B  | R1026W    | Platelet-type bleeding disorder 16                    |                                                                                                                                                   | LPV                     | 6 submissions: PV, PV, PV, PV, PV (2 associated with Glanzmann thrombastenia, 4 associated with platelet disorder type 16 that includes thrombocytopenia). ClinGen has curated this variant for Glanzmann thrombastenia as VUS (but not yet curated this variant for platelet disorder type 16) (accession | Not present in the Glanzmann thrombastenia database <a href="https://glanzmann.mcw.edu">https://glanzmann.mcw.edu</a>                                                                     |
| NIHR Biosource - Cambridge University, UK                                                                                                                                                                                                                                                        |         |           | Platelet-type bleeding disorder 16                    |                                                                                                                                                   | PV                      |                                                                                                                                                                                                                                                                                                            |                                                                                                                                                                                           |
| NIHR Biosource - Cambridge University, UK                                                                                                                                                                                                                                                        |         |           | Platelet-type bleeding disorder 16                    |                                                                                                                                                   | PV                      |                                                                                                                                                                                                                                                                                                            |                                                                                                                                                                                           |
| Northern Blood Research Centre, Sydney, AU                                                                                                                                                                                                                                                       |         |           | Glanzmann 's thrombastenia AD                         | Bleeding history without family history. Mild thrombocytopenia previously diagnosed as immune thrombocytopenia. Bleeding Assessment Tool (BAT)    | PV                      |                                                                                                                                                                                                                                                                                                            |                                                                                                                                                                                           |
| Grupo Español de Alteraciones Plaquetarias                                                                                                                                                                                                                                                       | MYH9    | E1841K    | May-Hegglin and other MYH9 disorders                  | Macrothrombocytopenia, Döhle bodies                                                                                                               | LPV                     | 4 submissions: PV, PV, PV, PV (accession RCV000015119.28)                                                                                                                                                                                                                                                  | -                                                                                                                                                                                         |
| Northern Blood Research Centre, Sydney, AU                                                                                                                                                                                                                                                       |         |           | May-Hegglin and other MYH9 disorders                  | Severe macrothrombocytopenia, Döhle body-like inclusions                                                                                          | PV                      |                                                                                                                                                                                                                                                                                                            |                                                                                                                                                                                           |
| Institute of Experimental Biomedicine, Univ                                                                                                                                                                                                                                                      | MYH9    | S96L      | Thrombocytopenia                                      |                                                                                                                                                   | VUS                     | 5 submissions: PV, PV, PV, PV, LPV (accession RCV000015138.25)                                                                                                                                                                                                                                             | -                                                                                                                                                                                         |
| Grupo Español de Alteraciones Plaquetarias                                                                                                                                                                                                                                                       |         |           | May-Hegglin and other MYH9 disorders                  | Macrothrombocytopenia and Döhle bodies, deafness and mild renal disease                                                                           | PV                      |                                                                                                                                                                                                                                                                                                            |                                                                                                                                                                                           |
| Northern Blood Research Centre, Sydney, AU                                                                                                                                                                                                                                                       |         |           | May-Hegglin and other MYH9 disorders                  | Macrothrombocytopenia                                                                                                                             | PV                      |                                                                                                                                                                                                                                                                                                            |                                                                                                                                                                                           |
| Institute of Experimental Biomedicine, Univ                                                                                                                                                                                                                                                      |         |           | Thrombocytopenia May-Hegglin and other MYH9 disorders |                                                                                                                                                   | PV                      |                                                                                                                                                                                                                                                                                                            |                                                                                                                                                                                           |
| NIHR Biosource - Cambridge University, UK                                                                                                                                                                                                                                                        | MYH9    | W828R     | May-Hegglin and other MYH9 disorders                  |                                                                                                                                                   | LPV                     | Absent                                                                                                                                                                                                                                                                                                     | -                                                                                                                                                                                         |
| Northern Blood Research Centre, Sydney, AU                                                                                                                                                                                                                                                       |         |           | MYH9-related disorders                                | Familial macrothrombocytopenia with Döhle-like bodies by immunofluorescence                                                                       | PV                      |                                                                                                                                                                                                                                                                                                            |                                                                                                                                                                                           |
| Center for Molecular and Vascular Biology, L                                                                                                                                                                                                                                                     | PROC    | F362I     | Protein C deficiency                                  | Pulmonary embolism, low protein C                                                                                                                 | VUS                     | Absent                                                                                                                                                                                                                                                                                                     | -                                                                                                                                                                                         |
| NIHR Biosource - Cambridge University, UK                                                                                                                                                                                                                                                        |         |           | Protein C deficiency                                  |                                                                                                                                                   | LPV                     |                                                                                                                                                                                                                                                                                                            |                                                                                                                                                                                           |
| Center for Molecular and Vascular Biology, L                                                                                                                                                                                                                                                     | PROC    | P369L     | Protein C deficiency                                  | Deep vein thrombosis, pulmonary embolism, low prote                                                                                               | VUS                     | Absent                                                                                                                                                                                                                                                                                                     | -                                                                                                                                                                                         |
| NIHR Biosource - Cambridge University, UK                                                                                                                                                                                                                                                        |         |           | Protein C deficiency                                  |                                                                                                                                                   | LPV                     |                                                                                                                                                                                                                                                                                                            |                                                                                                                                                                                           |
| NIHR Biosource - Cambridge University, UK                                                                                                                                                                                                                                                        | PROS1   | S501P     | Protein S deficiency                                  | Deep vein thrombosis                                                                                                                              | VUS                     | 6 submissions: PV, VUS, VUS, VUS, LBV (accession VCV000013316.6)                                                                                                                                                                                                                                           | -                                                                                                                                                                                         |
| Center for Molecular and Vascular Biology, L                                                                                                                                                                                                                                                     |         |           | Protein S deficiency                                  | Pulmonary embolism                                                                                                                                | VUS                     |                                                                                                                                                                                                                                                                                                            |                                                                                                                                                                                           |
| Center for Molecular and Vascular Biology, L                                                                                                                                                                                                                                                     |         |           | Protein S deficiency                                  | Deep vein thrombosis                                                                                                                              | VUS                     |                                                                                                                                                                                                                                                                                                            |                                                                                                                                                                                           |
| Center for Molecular and Vascular Biology, L                                                                                                                                                                                                                                                     |         |           | Protein S deficiency                                  |                                                                                                                                                   | VUS                     |                                                                                                                                                                                                                                                                                                            |                                                                                                                                                                                           |
| Center for Molecular and Vascular Biology, L                                                                                                                                                                                                                                                     |         |           | Protein S deficiency                                  | Deep vein thrombosis, Low protein S                                                                                                               | LPV                     |                                                                                                                                                                                                                                                                                                            |                                                                                                                                                                                           |
| Center for Molecular and Vascular Biology, L                                                                                                                                                                                                                                                     |         |           | Protein S deficiency                                  | familial thrombosis                                                                                                                               | LPV                     |                                                                                                                                                                                                                                                                                                            |                                                                                                                                                                                           |

|                                                                  |       |        |                                                          |                                                            |     |                                                                                                      |                                                                       |
|------------------------------------------------------------------|-------|--------|----------------------------------------------------------|------------------------------------------------------------|-----|------------------------------------------------------------------------------------------------------|-----------------------------------------------------------------------|
| Center for Molecular and Vascular Biology, L                     |       |        | Protein S deficiency                                     | Deep vein thrombosis, Low protein S                        | LPV |                                                                                                      |                                                                       |
| Center for Molecular and Vascular Biology, L                     |       |        | Protein S deficiency                                     | Deep vein thrombosis and arterial thrombosis               | LPV |                                                                                                      |                                                                       |
| Center for Molecular and Vascular Biology, L                     |       |        | Protein S deficiency                                     | Low protein S                                              | LPV |                                                                                                      |                                                                       |
| NIHR Bioresource - Cambridge University, UK                      | TUBB1 | G109E  | Macrothrombocytopenia, beta-tubulin 1 related            |                                                            | VUS | 3 submissions: LPV, VUS, VUS (accession RCV000851597.1)                                              | -                                                                     |
| Center for Molecular and Vascular Biology, L                     |       |        | Macrothrombocytopenia, beta-tubulin 1 related            | Macrothrombocytopenia                                      | VUS |                                                                                                      |                                                                       |
| Northern Blood Research Centre, Sydney, Australia                |       |        | Macrothrombocytopenia                                    | Macrothrombocytopenia without bleeding; family history     | VUS |                                                                                                      |                                                                       |
| Katharine Dormandy Haemophilia and Thrombosis Centre, London, UK |       |        | Thrombocytopenia                                         |                                                            | VUS |                                                                                                      |                                                                       |
| Grupo Español de Alteraciones Plaquetarias                       |       |        | Macrothrombocytopenia, autosomal dominant, TUBB1-related | Macrothrombocytopenia; No significant bleeding             | LPV |                                                                                                      |                                                                       |
| Center for Molecular and Vascular Biology, L                     | VWF   | N2546Y | von Willebrand disease                                   | Low VWF antigen and activity / mild thrombocytopenia       | VUS | 1 submission: no class (accession RCV000086894.1)                                                    | www.vwf.group.shef.ac.uk. Homozygous patient VWDtype3                 |
| NIHR Bioresource - Cambridge University, UK                      |       |        | von Willebrand disease                                   |                                                            | LPV |                                                                                                      |                                                                       |
| NIHR Bioresource - Cambridge University, UK                      | VWF   | R1308C | von Willebrand disease                                   |                                                            | LPV | 6 submissions: PV, PV, PV, PV, LPV, no evidence (accession RCV000000313.3)                           | www.vwf.group.shef.ac.uk. Patient VWDtype2B                           |
| University of Perugia, Department of Medicine                    |       |        | von Willebrand disease                                   |                                                            | PV  |                                                                                                      |                                                                       |
| Center for Molecular and Vascular Biology, L                     | VWF   | R1399C | von Willebrand disease                                   | von Willebrand disease type 2                              | VUS | 5 submissions: LPV, LPV, LPV, VUS, no evidence (accession VCV000100337.7)                            | www.vwf.group.shef.ac.uk. Homozygous patient and heterozygous patient |
| NIHR Bioresource - Cambridge University, UK                      |       |        | von Willebrand disease                                   |                                                            | LPV |                                                                                                      |                                                                       |
| Center for Molecular and Vascular Biology, L                     | VWF   | Y1584C | von Willebrand disease                                   | Miscarriage / low VWF antigen and activity                 | VUS | 9 submissions: no evidence, risk factor, VUS, VUS, VUS, LPV, LPV, LPV, PV (accession VCV000015349.2) | www.vwf.group.shef.ac.uk. VWDtype1 and reported as polymorphism       |
| Center for Molecular and Vascular Biology, L                     |       |        | von Willebrand disease                                   | von Willebrand disease type1                               | VUS |                                                                                                      |                                                                       |
| Center for Molecular and Vascular Biology, L                     |       |        | von Willebrand disease                                   | low VWF levels / Platelet aggregation defect / neonatal in | VUS |                                                                                                      |                                                                       |
| Katharine Dormandy Haemophilia and Thrombosis Centre, London, UK |       |        | von Willebrand disease                                   |                                                            | VUS |                                                                                                      |                                                                       |
| NIHR Bioresource - Cambridge University, UK                      |       |        | von Willebrand disease                                   |                                                            | LPV |                                                                                                      |                                                                       |
| NIHR Bioresource - Cambridge University, UK                      |       |        | von Willebrand disease                                   |                                                            | PV  |                                                                                                      |                                                                       |
